# Supplementary material for: Characterization and Validation of an “Acute Aerobic Exercise Load” as a Tool to Assess Antioxidative and Anti-inflammatory Nutrition in Healthy Subjects Using a Statistically Integrated Approach in a Comprehensive Clinical Trial
Source: Oxid Med Cell Longev. 2019 Sep 8;2019:9526725. doi: 10.1155/2019/9526725 (PMC6755301; doi:10.1155/2019/9526725)
Supplement: Supplementary Materials — Supplementary Table S1: list of differential markers before and following AAE load. Supplementary Table S2: KEGG pathways related to oxidative and inflammatory stresses identified by AAE load. Supplementary Table S3: list of the differentially expressed genes and metabolites that best describe transcriptomic changes after KBR intervention with or without AAE load. Supplementary Table S4: correlations (≥0.7 or ≤-0.7) among differential markers after KBR intervention under no and AAE load. Supplementary Table S5: KEGG pathways related to oxidative stress after KBR intervention with and without AAE load. [file 9526725.f1.xlsx]

## Sheet: TableS1
Supplementary Table S1. List of differential markers before and following AAE load
Category	Probe	Estimate	FDR p-valus	ENSGID	Full name
Biochemical markers	Erythrocyte GSH	-2.5063	0.0092		glutathione
	Erythrocyte CAT	11.551	0.0312		catalase
	Plasma albumin	0.168814	0.0266
	Plasma LDH	0.237182	<.0001		lactate dehydrogenase
	Plasma IL-6	0.141894	0.0016		interleukine-6
Metabolomes	Glycerol	0.126675	0.0323
	Lactate	0.211943	0.0015
	Succinate	0.167298	0.0015
	3-Hydroxyisovalerate	-0.0623096	0.0153
	Adenine	0.212079	0.0005
	Formate	-0.137647	0.0269
	Glucose	0.0764884	0.0061
	Glycine	-0.0945379	0.0087
	Histidine	-0.0144244	0.0269
	Leucine	-0.000647923	0.0269
	Lysine	-0.153703	0.0096
Transcriptomes	NPB	343.388	0.0357734	ENSG00000183979	neuropeptide B
	APITD1-CORT	47.8153	0.0190611	ENSG00000251503	APITD1-CORT readthrough
	PCDHGC5	39.9669	0.0319845	ENSG00000240764	protocadherin gamma subfamily C, 5
	GOSR2	24.972	0.0174622	ENSG00000262633	Golgi SNAP receptor complex member 2; Uncharacterized protein
	POC1B-GALNT4	15.9035	0.0351196	ENSG00000259075	POC1B-GALNT4 readthrough
	RPSAP58	4.55488	0.010453	ENSG00000205246	ribosomal protein SA pseudogene 58
	WNT5A	4.33529	0.0151803	ENSG00000114251	wingless-type MMTV integration site family, member 5A
	NGFR	2.19678	0.0074166	ENSG00000064300	nerve growth factor receptor
	MOG	2.09907	0.0283888	ENSG00000204655	myelin oligodendrocyte glycoprotein
	MAG	1.86059	0.0239153	ENSG00000105695	myelin associated glycoprotein
	IGF2	1.75063	2.2011e-05	ENSG00000167244	insulin-like growth factor 2 (somatomedin A)
	TMEM98	1.64282	0.0451719	ENSG00000006042	transmembrane protein 98
	HOXA3	1.58962	0.000589587	ENSG00000105997	homeobox A3
	EML1	1.54795	0.0441667	ENSG00000066629	echinoderm microtubule associated protein like 1
	MEX3A	1.52378	0.000526672	ENSG00000254726	mex-3 homolog A (C. elegans)
	FAM132B	1.48873	0.000748749	ENSG00000178752	family with sequence similarity 132, member B
	GABRB2	1.38671	0.0349756	ENSG00000145864	gamma-aminobutyric acid (GABA) A receptor, beta 2
	SDK1	1.36031	0.00823208	ENSG00000146555	sidekick cell adhesion molecule 1
	FOSB	1.3505	2.04894e-06	ENSG00000125740	FBJ murine osteosarcoma viral oncogene homolog B
	FOS	1.2824	5.56758e-09	ENSG00000170345	FBJ murine osteosarcoma viral oncogene homolog
	KAZALD1	1.28223	0.00401391	ENSG00000107821	Kazal-type serine peptidase inhibitor domain 1
	EGFL6	1.21936	0.0444051	ENSG00000198759	EGF-like-domain, multiple 6
	FGD5	1.20573	0.0282809	ENSG00000154783	FYVE, RhoGEF and PH domain containing 5
	CC2D2A	1.20105	0.00979255	ENSG00000048342	coiled-coil and C2 domain containing 2A
	POU1F1	1.18335	0.00918898	ENSG00000064835	POU class 1 homeobox 1
	PGLYRP2	1.12783	0.0240145	ENSG00000161031	peptidoglycan recognition protein 2
	CPNE7	1.11998	0.038126	ENSG00000178773	copine VII
	SYCE2	1.11373	0.0334219	ENSG00000161860	synaptonemal complex central element protein 2
	ABCB11	1.11235	0.00439007	ENSG00000073734	ATP-binding cassette, sub-family B (MDR/TAP), member 11
	TAS1R1	1.11047	0.0108904	ENSG00000173662	taste receptor, type 1, member 1
	PCDHB2	1.09998	0.0335515	ENSG00000112852	protocadherin beta 2
	DNALI1	1.09437	0.0205611	ENSG00000163879	dynein, axonemal, light intermediate chain 1
	CCDC181	1.07833	0.00432173	ENSG00000117477	coiled-coil domain containing 181
	OSCP1	1.07256	0.037425	ENSG00000116885	organic solute carrier partner 1
	MKRN3	1.06904	0.0343505	ENSG00000179455	makorin ring finger protein 3
	TRDV3	1.04833	0.00468056	ENSG00000256590	T cell receptor delta variable 3
	EREG	1.03154	0.0127259	ENSG00000124882	epiregulin
	B4GALNT4	1.02092	0.046035	ENSG00000182272	beta-1,4-N-acetyl-galactosaminyl transferase 4
	TMX2-CTNND1	-364.712	0.0220303	ENSG00000254462	TMX2-CTNND1 readthrough (non-protein coding)
	INS-IGF2	-294.073	0.0137833	ENSG00000129965	INS-IGF2 readthrough
	AL136218.1	-217.931	0.0385857	ENSG00000215462	Sarcoma antigen NY-SAR-79; Uncharacterized protein
	SAMD11	-194.32	0.0363106	ENSG00000187634	sterile alpha motif domain containing 11
	PRH1	-173.622	0.0298267	ENSG00000231887	Salivary acidic proline-rich phosphoprotein 1/2 Salivary acidic proline-rich phosphoprotein 1/2 Salivary acidic proline-rich phosphoprotein 3/4 Peptide P-C
	CKLF-CMTM1	-121.768	0.0235211	ENSG00000254788	CKLF-CMTM1 readthrough
	FRY-AS1	-46.6321	0.0275829	ENSG00000237637	FRY antisense RNA 1
	HMGA2	-21.5782	0.0212421	ENSG00000149948	high mobility group AT-hook 2
	LY75-CD302	-12.5483	0.00793026	ENSG00000248672	LY75-CD302 readthrough
	SFT2D3	-12.2819	0.00358597	ENSG00000173349	SFT2 domain containing 3
	TBC1D3G	-11.3504	0.00227294	ENSG00000161583	TBC1 domain family, member 3G
	HIST1H3J	-8.80757	0.0289991	ENSG00000197153	histone cluster 1, H3j
	NODAL	-6.03709	0.0095622	ENSG00000156574	nodal growth differentiation factor
	RUNX1T1	-4.20083	0.0295829	ENSG00000079102	runt-related transcription factor 1; translocated to, 1 (cyclin D-related)
	DGKI	-2.86356	0.031481	ENSG00000157680	diacylglycerol kinase, iota
	RIBC2	-2.11736	0.00291528	ENSG00000128408	RIB43A domain with coiled-coils 2
	MUC16	-2.03399	0.00513031	ENSG00000181143	mucin 16, cell surface associated
	SLC1A2	-1.95794	0.0314992	ENSG00000110436	solute carrier family 1 (glial high affinity glutamate transporter), member 2
	TENM4	-1.80256	0.0285155	ENSG00000149256	teneurin transmembrane protein 4
	IL10	-1.76236	0.00410773	ENSG00000136634	interleukin 10
	ADAM28	-1.62939	0.00155166	ENSG00000042980	ADAM metallopeptidase domain 28
	PDE6C	-1.62769	0.0270485	ENSG00000095464	phosphodiesterase 6C, cGMP-specific, cone, alpha prime
	SIGLEC14	-1.52523	0.049076	ENSG00000254415	sialic acid binding Ig-like lectin 14
	TMPRSS11E	-1.45637	0.0349485	ENSG00000087128	transmembrane protease, serine 11E
	FAM27E2	-1.40808	0.00490924	ENSG00000204807	family with sequence similarity 27, member E2
	TSPAN16	-1.40717	0.0159933	ENSG00000130167	tetraspanin 16
	WSCD2	-1.39071	0.0136345	ENSG00000075035	WSC domain containing 2
	KCTD19	-1.33284	0.0329828	ENSG00000168676	potassium channel tetramerisation domain containing 19
	CDO1	-1.30013	0.0473562	ENSG00000129596	cysteine dioxygenase, type I
	CKMT2	-1.26874	0.0412427	ENSG00000131730	creatine kinase, mitochondrial 2 (sarcomeric)
	GPLD1	-1.25718	0.00400115	ENSG00000112293	glycosylphosphatidylinositol specific phospholipase D1
	CASP16	-1.24548	0.00665198	ENSG00000228146	caspase 16, apoptosis-related cysteine peptidase (putative)
	ANKRD29	-1.23004	0.00958271	ENSG00000154065	ankyrin repeat domain 29
	DAB1	-1.15922	0.019461	ENSG00000173406	Dab, reelin signal transducer, homolog 1 (Drosophila)
	EFCAB1	-1.15267	0.0379822	ENSG00000034239	EF-hand calcium binding domain 1
	KCNK1	-1.14774	0.0253972	ENSG00000135750	potassium channel, subfamily K, member 1
	NBPF24	-1.13864	0.00813598	ENSG00000203836	neuroblastoma breakpoint family, member 24
	RHPN2	-1.13528	0.00619531	ENSG00000131941	rhophilin, Rho GTPase binding protein 2
	TNXB	-1.13375	0.0016153	ENSG00000168477	tenascin XB
	C2orf50	-1.13095	0.00306344	ENSG00000150873	chromosome 2 open reading frame 50
	COL24A1	-1.12839	0.0189146	ENSG00000171502	collagen, type XXIV, alpha 1
	TVP23C-CDRT4	-1.12756	0.016124	ENSG00000259024	TVP23C-CDRT4 readthrough
	DES	-1.11765	0.0265332	ENSG00000175084	desmin
	STARD13	-1.11566	0.00948651	ENSG00000133121	StAR-related lipid transfer (START) domain containing 13
	ERCC6L	-1.11337	1.08095e-05	ENSG00000186871	excision repair cross-complementing rodent repair deficiency, complementation group 6-like
	PCDH17	-1.10651	0.0154997	ENSG00000118946	protocadherin 17
	OR10AD1	-1.06838	0.0146279	ENSG00000172640	olfactory receptor, family 10, subfamily AD, member 1
	MUC20	-1.04919	0.00820848	ENSG00000176945	mucin 20, cell surface associated
	WTIP	-1.03642	0.0478912	ENSG00000142279	Wilms tumor 1 interacting protein
	TRIM45	-1.01577	0.00356651	ENSG00000134253	tripartite motif containing 45
	TAS2R31	-1.00684	0.0487295	ENSG00000256436	taste receptor, type 2, member 31

## Sheet: TableS2
Supplementary Table S2. KEGG pathways related to oxidative and inflammatory stresses identified by AAE load
Category	Markers	Pathway	Reference
Clinical chemistry	CAT	Amyotrophic lateral sclerosis (ALS)	PMID: 21397008
		FoxO signaling pathway	https://www.ncbi.nlm.nih.gov/biosystems/921162
		Glyoxylate and dicarboxylate metabolism	PMID: 27036942
		Longevity regulating pathway	https://www.ncbi.nlm.nih.gov/biosystems/1319989
		Peroxisome	https://www.ncbi.nlm.nih.gov/biosystems/131226
		Tryptophan metabolism	PMID: 16420391; PMID: 27832762
Clinical chemistry	GSH	ABC transporters	PMID: 28264441; PMID: 20138281
		Bile secretion	PMID: 18376363; PMID: 28606651
		Cysteine and methionine metabolism	PMID: 24274312
		Ferroptosis	PMID: 28552631
		Glutathione metabolism	PMID: 9296459; PMID: 11233143
Clinical chemistry	IL-6	Cellular senescence	PMID: 28593022; PMID: 20444648
		Cytokine-cytokine receptor interaction	https://www.ncbi.nlm.nih.gov/biosystems/83051
		FoxO signaling pathway	https://www.ncbi.nlm.nih.gov/biosystems/921162
		HIF-1 signaling pathway	PMID: 11440977; PMID: 27982118; PMID: 25784597
		IL-17 signaling pathway	https://www.ncbi.nlm.nih.gov/biosystems/1474301
		Insulin resistance	PMID: 16823477
		Jak-STAT signaling pathway	PMID: 9843726; Ivashkiv L.B. (2012) Crosstalk with the Jak-STAT Pathway in Inflammation. In: Decker T., Müller M. (eds) Jak-Stat Signaling : From Basics to Disease. Springer, Vienna
		NOD-like receptor signaling pathway	https://www.ncbi.nlm.nih.gov/biosystems/122191
		PI3K-Akt signaling pathway	PMID: 27494022; PMID: 18628779
		Rheumatoid arthritis	https://www.ncbi.nlm.nih.gov/biosystems/200309
		Th17 cell differentiation	https://www.ncbi.nlm.nih.gov/biosystems/1469482
		TNF signaling pathway	https://www.ncbi.nlm.nih.gov/biosystems/812256
		Toll-like receptor signaling pathway	PMID: 20888253; PMID: 20706658; https://www.ncbi.nlm.nih.gov/biosystems/83076
Clinical chemistry	LDH	Cysteine and methionine metabolism	PMID: 24274312
		Glucagon signaling pathway	PMID: 12649389
		Glycolysis / Gluconeogenesis	PMID: 12649389
		HIF-1 signaling pathway	PMID: 11440977; PMID: 27982118; PMID: 25784597
		Propanoate metabolism	PMID: 28098242
		Pyruvate metabolism	PMID: 21397008; PMID: 24363178
Metabolite	Formate	Glyoxylate and dicarboxylate metabolism	PMID: 27036942
		Nitrogen metabolism	PMID: 14645387; PMID: 10807397
		Pyruvate metabolism	PMID: 21397008; PMID: 24363178
Metabolite	Glucose	ABC transporters	PMID: 28264441; PMID: 20138281
		Amino sugar and nucleotide sugar metabolism	PMID: 27562382
		AMPK signaling pathway	PMID: 26116070; PMID: 27506528
		Bile secretion	PMID: 18376363; PMID: 28606651
		FoxO signaling pathway	https://www.ncbi.nlm.nih.gov/biosystems/921162
		Glucagon signaling pathway	PMID: 12649389
		Glycolysis / Gluconeogenesis	PMID: 12649389
		HIF-1 signaling pathway	PMID: 11440977; PMID: 27982118; PMID: 25784597
		Insulin resistance	PMID: 16823477
		Insulin secretion	PMID: 17045527; PMID: 28791439
		Insulin signaling pathway	PMID: 21397008; PMID: 28791439
		Pentose phosphate pathway	PMID: 21397008
Metabolite	Glycerol	ABC transporters	PMID: 28264441; PMID: 20138281
Metabolite	Lysine	ABC transporters	PMID: 28264441; PMID: 20138281
		Aminoacyl-tRNA biosynthesis	PMID: 20160114
		Lysine degradation	PMID: 21397008
Metabolite	Succinate	Alanine, aspartate and glutamate metabolism	PMID: 28161796
		cAMP signaling pathway	PMID: 19254571; PMID: 24145604
		Citrate cycle (TCA cycle)	PMID: 15556078
		Glucagon signaling pathway	PMID: 12649389
		Glyoxylate and dicarboxylate metabolism	PMID: 27036942
		Nicotinate and nicotinamide metabolism	PMID: 20922447; PMID: 27251379
		Oxidative phosphorylation	PMID: 19254571; PMID: 21397008
		Phenylalanine metabolism	PMID: 21514861
		Propanoate metabolism	PMID: 28098242
		Pyruvate metabolism	PMID: 21397008; PMID: 24363178
		Sulfur metabolism	PMID: 26071878
		Tyrosine metabolism	PMID: 23990339; PMID: 21277567
Transcript	ABCB11	ABC transporters	PMID: 28264441; PMID: 20138281
		Bile secretion	PMID: 18376363; PMID: 28606651
Transcript	CKMT2	Arginine and proline metabolism	PMID: 26413039
Transcript	EREG	ErbB signaling pathway	PMID: 22178795; https://www.ncbi.nlm.nih.gov/gene/2069
Transcript	FOS	Apoptosis	PMID: 10996508; PMID: 18475609
		cAMP signaling pathway	PMID: 19254571; PMID: 24145604
		Cholinergic synapse	PMID: 19079659
		Fluid shear stress and atherosclerosis	https://www.ncbi.nlm.nih.gov/biosystems/1474302
		IL-17 signaling pathway	https://www.ncbi.nlm.nih.gov/biosystems/1474301
		MAPK signaling pathway	PMID: 16987031; https://www.ncbi.nlm.nih.gov/biosystems/83048
		Osteoclast differentiation	PMID: 23954472; PMID: 28992140
		Rheumatoid arthritis	https://www.ncbi.nlm.nih.gov/biosystems/200309
		Th17 cell differentiation	https://www.ncbi.nlm.nih.gov/biosystems/1469482
		TNF signaling pathway	https://www.ncbi.nlm.nih.gov/biosystems/812256
		Toll-like receptor signaling pathway	PMID: 20888253; PMID: 20706658; https://www.ncbi.nlm.nih.gov/biosystems/83076
		IL-17 signaling pathway	https://www.ncbi.nlm.nih.gov/biosystems/1474301
Transcript	FOSB	Osteoclast differentiation	PMID: 23954472; PMID: 28992140
Transcript	IGF2	MAPK signaling pathway	PMID: 16987031; https://www.ncbi.nlm.nih.gov/biosystems/83048
		PI3K-Akt signaling pathway	PMID: 27494022; PMID: 18628779
		Ras signaling pathway	PMID: 27889448
Transcript	NGFR	Apoptosis	PMID: 10996508; PMID: 18475609
		Cytokine-cytokine receptor interaction	https://www.ncbi.nlm.nih.gov/biosystems/83051
		MAPK signaling pathway	PMID: 16987031; https://www.ncbi.nlm.nih.gov/biosystems/83048
		PI3K-Akt signaling pathway	PMID: 27494022; PMID: 18628779
		Ras signaling pathway	PMID: 27889448
Transcript	PDE6C	Purine metabolism	PMID: 21397008; PMID: 16375736;
Transcript	WNT5A	mTOR signaling pathway	PMID: 28904868; PMID: 25884210
		Wnt signaling pathway	PMID: 28108274; PMID: 27713747

## Sheet: TableS3
Supplementary Table S3. List of the differentially expressed genes and metabolites that best describe transcriptomic changes after KBR intervention with or without AAE load
Category	Name	Description	No load		AAE load
			Estimate	p-value	Estimate	p-value
Metabolomes	3-Indoxylsulfate		0.127483	0.125164	0.2191	0.0153523
	Alanine		0.0694224	0.133053	0.0986549	0.0420848
	Asparagine		0.130771	0.0278773	0.0423022	0.461964
	Carnitine		-0.241645	0.0446832	-0.240472	0.0625045
	Glutamine		0.0683323	0.0771521	0.122736	0.00126671
	Glycine		0.0888029	0.110907	0.085295	0.04803
	Histidine		0.027581	0.00207511	0.00847329	0.246669
	Lysine		0.142696	0.115036	0.143113	0.0499404
	N-Phenylacetylglycine		0.0093376	0.0167124	0.00452573	0.178504
	N6-Acetyllysine		0.00103656	0.231825	0.001363	0.0312898
	Phenylacetate		0.00254022	0.0376836	0.00138266	0.234381
	Serine		0.119944	0.0391869	0.0953974	0.0907462
	Trimethylamine		0.0127184	0.0392484	0.00413591	0.509937
Transcriptomes	NT5M	5',3'-nucleotidase, mitochondrial	0.121	0.6578	0.6062	0.0398
	PFKFB3	6-phosphofructo-2-kinase/fructose-2,6-biphosphatase 3	-0.5169	0.036	-0.3504	0.1383
	AKAP6	A kinase (PRKA) anchor protein 6	0.0171	0.9168	0.512	0.0065
	AK2	adenylate kinase 2	0.0951	0.6925	0.544	0.0367
	AKR1C3	aldo-keto reductase family 1, member C3	0.6553	0.0109	0.0468	0.837
	AHSP	alpha hemoglobin stabilizing protein	1.0526	0.0213	0.3723	0.3745
	CHTF8	Alternative protein CHTF8	-1.6032	0.0125	0.8795	0.1383
	ANKH	ankylosis, progressive homolog	0.5237	0.0142	0.4038	0.0488
	ANK1	ankyrin 1, erythrocytic	0.7743	0.0321	0.8333	0.0227
	ANTXRLP1	anthrax toxin receptor-like pseudogene 1	0.3344	0.2891	-0.8743	0.0121
	APOPT1	apoptogenic 1, mitochondrial	0.6815	0.008	0.1232	0.5854
	ARG1	arginase, liver	0.5184	0.0365	0.0685	0.7644
	ATP5E	ATP synthase, H+ transporting, mitochondrial F1 complex, epsilon subunit	0.5142	0.0471	0.19	0.4347
	ATG10	autophagy related 10	-0.0208	0.9329	0.528	0.0472
	BAG1	BCL2-associated athanogene	0.6657	0.0294	0.4749	0.1055
	BCL2L15	BCL2-like 15	0.6605	0.01	-0.2284	0.3211
	CACNA2D4	calcium channel, voltage-dependent, alpha 2/delta subunit 4	0.096	0.6361	-0.5688	0.0124
	CA4	carbonic anhydrase IV	-0.0669	0.7733	-0.5057	0.0436
	CRLS1	cardiolipin synthase 1	0.5967	0.0113	-0.2584	0.2272
	CD14	CD14 molecule	-0.517	0.0345	-0.3808	0.1066
	CD3D	CD3d molecule, delta (CD3-TCR complex)	0.6442	0.0481	0.2873	0.3504
	CD52	CD52 molecule	0.936	0.0213	0.0261	0.9435
	CD69	CD69 molecule	0.8504	0.0449	0.0427	0.9136
	CKS1B	CDC28 protein kinase regulatory subunit 1B	0.5074	0.5094	1.8987	0.0239
	CKS2	CDC28 protein kinase regulatory subunit 2	0.9142	0.0115	0.2554	0.4307
	CDC34	cell division cycle 34	0.5184	0.01	0.1752	0.3317
	CENPQ	centromere protein Q	0.7351	0.0251	-0.1548	0.6057
	CEP70	centrosomal protein 70kDa	0.5677	0.004	0.2896	0.1012
	XCL1	chemokine (C motif) ligand 1	0.5969	0.0126	0.46	0.0448
	XCL2	chemokine (C motif) ligand 2	0.5878	0.0434	0.3742	0.1794
	C1orf167	chromosome 1 open reading frame 167	-1.335	0.0145	-0.009	0.9852
	C1orf21	chromosome 1 open reading frame 21	0.6079	0.0361	0.1953	0.4689
	C10orf11	chromosome 10 open reading frame 11	-0.4062	0.4326	-1.103	0.0456
	C19orf59	chromosome 19 open reading frame 59	-0.2513	0.3406	-0.7508	0.0106
	C7orf55	chromosome 7 open reading frame 55	0.0984	0.5596	-0.607	0.0024
	CMSS1	cms1 ribosomal small subunit homolog (yeast)	1.1189	0.0052	-0.0105	0.9758
	CCDC122	coiled-coil domain containing 122	0.1432	0.5387	0.5713	0.0248
	CCDC167	coiled-coil domain containing 167	0.6194	0.0279	-0.0805	0.7547
	CCDC176	coiled-coil domain containing 176	0.6254	0.0333	0.427	0.1294
	CCDC23	coiled-coil domain containing 23	0.5356	0.0265	-0.3452	0.1324
	CHCHD6	coiled-coil-helix-coiled-coil-helix domain containing 6	0.5969	0.0145	0.2294	0.3018
	COMMD6	COMM domain containing 6	1.4345	0.0496	-0.0481	0.9435
	C3	complement component 3	-0.0891	0.7077	0.5046	0.048
	CFB	complement factor B	-0.0736	0.7487	-0.7336	0.0057
	CMC1	COX assembly mitochondrial protein 1 homolog	0.7764	0.0436	0.1878	0.6
	CLEC9A	C-type lectin domain family 9, member A	0.6473	0.0185	0.5238	0.049
	CCNB3	cyclin B3	0.9242	0.0449	-0.1438	0.7369
	CCNE2	cyclin E2	-0.1215	0.5471	-0.5855	0.01
	COX7B	cytochrome c oxidase subunit VIIb	0.7084	0.0359	-0.3667	0.2496
	DAAM1	dishevelled associated activator of morphogenesis 1	-0.0088	0.9734	0.6337	0.0289
	DNAJC25-GNG10	DNAJC25-GNG10 readthrough	-0.0172	0.9448	-0.6196	0.0235
	DARC	Duffy blood group, chemokine receptor	0.4438	0.0844	0.537	0.0412
	ERC1	ELKS/RAB6-interacting/CAST family member 1	-0.0069	0.9767	0.5021	0.0477
	EFTUD1	elongation factor Tu GTP binding domain containing 1	-0.2282	0.5757	0.9548	0.031
	ENO3	enolase 3 (beta, muscle)	-0.199	0.4576	-0.5642	0.0481
	EFNA5	ephrin-A5	0.5748	0.0466	-0.3061	0.2645
	EPS8	epidermal growth factor receptor pathway substrate 8	-0.6729	0.0179	-0.2054	0.4269
	EGFL8	Epidermal growth factor-like protein 8; Lysosomal thioesterase PPT2	-0.1677	0.3567	-0.5564	0.0069
	EPB49	erythrocyte membrane protein band 4.9 (dematin)	0.4895	0.0863	0.6712	0.024
	ESPN	espin	-0.0588	0.8532	0.6774	0.0475
	EEF1E1	eukaryotic translation elongation factor 1 epsilon 1	0.931	0.0187	0.1038	0.7713
	FAM198B	family with sequence similarity 198, member B	-0.2378	0.2874	-0.5177	0.0304
	FAM210B	family with sequence similarity 210, member B	0.5738	0.0433	0.4708	0.0898
	FAN1	FANCD2/FANCI-associated nuclease 1	-0.0097	0.9576	0.523	0.0113
	FOSB	FBJ murine osteosarcoma viral oncogene homolog B	-0.0263	0.907	0.5772	0.0207
	FBXO4	F-box protein 4	0.5701	0.0101	0.123	0.5319
	FGFBP2	fibroblast growth factor binding protein 2	0.5862	0.0066	0.0989	0.5996
	FUNDC2	FUN14 domain containing 2	0.6865	0.0321	0.1327	0.6525
	GPR27	G protein-coupled receptor 27	-0.3004	0.2082	-0.5636	0.0267
	GPR84	G protein-coupled receptor 84	-0.1457	0.4717	-0.5845	0.0102
	GIPR	gastric inhibitory polypeptide receptor	0.791	0.0275	-0.1916	0.5607
	GEMIN6	gem (nuclear organelle) associated protein 6	0.5003	0.0205	0.1266	0.519
	GYPC	glycophorin C (Gerbich blood group)	0.5951	0.0463	0.5432	0.0658
	GZMA	granzyme A (granzyme 1, cytotoxic T-lymphocyte-associated serine esterase 3)	0.9707	0.0292	0.1919	0.6385
	GNAO1	guanine nucleotide binding protein (G protein), alpha activating activity polypeptide O	0.0043	0.9818	0.503	0.0157
	HP	haptoglobin	-0.1968	0.4144	-0.552	0.0334
	AC073043.2	HCG1653746, isoform CRA_c; Uncharacterized protein	0.546	0.0106	0.2059	0.2851
	HECW2	HECT, C2 and WW domain containing E3 ubiquitin protein ligase 2	1.0404	0.0112	-0.6962	0.0711
	HBD	hemoglobin, delta	0.9252	0.0102	0.2086	0.5145
	HDGFRP3	Hepatoma-derived growth factor-related protein 3	0.6141	0.0081	-0.1097	0.5906
	HK3	hexokinase 3 (white cell)	-0.398	0.0984	-0.6364	0.0133
	HHIPL2	HHIP-like 2	0.514	0.0078	0.0525	0.7563
	HIST1H4H	histone cluster 1, H4h	-0.5283	0.0178	0.044	0.8263
	POLR2J2	Homo sapiens polymerase (RNA) II (DNA directed) polypeptide J3	0.0992	0.6819	0.5201	0.0455
	HGD	homogentisate 1,2-dioxygenase	0.6911	0.0136	0.0345	0.8901
	HOPX	HOP homeobox	0.7906	0.0023	0.1381	0.526
	HSCB	HscB iron-sulfur cluster co-chaperone homolog (E. coli)	0.507	0.0283	-0.0299	0.8876
	IGHG4	immunoglobulin heavy constant gamma 4	0.0994	0.7814	0.9589	0.0163
	IGHV1-8	immunoglobulin heavy variable 1-8	-1.1876	0.0339	-0.8172	0.1281
	IGHV3-64	immunoglobulin heavy variable 3-64	-0.8356	0.0381	-0.2704	0.4711
	IGHV4-28	immunoglobulin heavy variable 4-28	-1.336	0.0141	-0.1928	0.6919
	IGHV4-31	immunoglobulin heavy variable 4-31	-1.2066	0.0273	-0.4166	0.4094
	IGKV3D-11	immunoglobulin kappa variable 3D-11	-0.8983	0.0396	-0.3373	0.4085
	IGLV3-10	immunoglobulin lambda variable 3-10	-1.4302	0.0419	-0.5343	0.4169
	ITGA3	integrin, alpha 3 (antigen CD49C, alpha 3 subunit of VLA-3 receptor)	-0.5634	0.0199	0.2233	0.3153
	IL15	interleukin 15	-0.0129	0.9509	-0.525	0.0229
	IL4	interleukin 4	0.7979	0.0451	-0.13	0.7253
	IL8	interleukin 8	0.784	0.026	0.0731	0.8199
	JUP	junction plakoglobin	-0.564	0.048	-0.1249	0.6389
	JSRP1	junctional sarcoplasmic reticulum protein 1	0.5153	0.0462	0.0677	0.7781
	KRT1	keratin 1	0.2437	0.3032	0.721	0.0069
	KLRB1	killer cell lectin-like receptor subfamily B, member 1	0.811	0.0325	0.3557	0.3156
	KLRC1	killer cell lectin-like receptor subfamily C, member 1	0.8551	0.0238	0.111	0.7469
	KLRC2	killer cell lectin-like receptor subfamily C, member 2	0.7584	0.0345	0.1818	0.5834
	KLRD1	killer cell lectin-like receptor subfamily D, member 1	0.5141	0.0111	0.0154	0.9312
	KLRF1	killer cell lectin-like receptor subfamily F, member 1	0.6882	0.024	0.0169	0.9515
	LRWD1	leucine-rich repeats and WD repeat domain containing 1	-0.2431	0.2037	-0.5839	0.0064
	LSM1	LSM1 homolog, U6 small nuclear RNA associated	0.611	0.0318	0.2316	0.3814
	LSM5	LSM5 homolog, U6 small nuclear RNA associated (S. cerevisiae)	0.5632	0.0496	0.0611	0.8189
	LPAR1	lysophosphatidic acid receptor 1	-0.311	0.111	-0.6149	0.0046
	MFSD4	major facilitator superfamily domain containing 4	0.3153	0.0963	0.5637	0.0066
	MAP3K7CL	MAP3K7 C-terminal like	0.717	0.0372	0.115	0.7174
	MTCP1	mature T-cell proliferation 1	0.9284	0.0122	0.0577	0.8608
	MED31	mediator complex subunit 31	0.5221	0.0026	0.0115	0.9371
	MTX2	metaxin 2	0.5208	0.0102	0.0683	0.7033
	MRPL15	mitochondrial ribosomal protein L15	0.5001	0.0291	0.0895	0.6703
	MRPL36	mitochondrial ribosomal protein L36	0.611	0.0321	0.1847	0.4839
	MRPL40	mitochondrial ribosomal protein L40	0.5604	0.0499	-0.1817	0.4979
	MOB4	MOB family member 4, phocein	0.6876	0.0203	0.0762	0.7761
	MYOM2	myomesin 2	0.8667	0.0013	0.0303	0.8903
	MYL4	myosin, light chain 4, alkali; atrial, embryonic	0.8325	0.0218	0.7555	0.0345
	NAT1	N-acetyltransferase 1 (arylamine N-acetyltransferase)	0.5872	0.0395	-0.1264	0.6326
	NDUFA4	NADH dehydrogenase (ubiquinone) 1 alpha subcomplex, 4, 9kDa	0.7743	0.0477	0.2274	0.5341
	NDUFAF2	NADH dehydrogenase (ubiquinone) complex I, assembly factor 2	0.9489	0.0124	0.2636	0.4392
	NR4A1	nuclear receptor subfamily 4, group A, member 1	-0.5879	0.0034	-0.2504	0.1563
	OSM	oncostatin M	-0.2667	0.314	-0.6164	0.0301
	OPTN	optineurin	0.5784	0.0196	0.2951	0.2003
	OVCA2	ovarian tumor suppressor candidate 2	-0.2308	0.6011	0.9666	0.0418
	OSBP2	oxysterol binding protein 2	0.6502	0.0459	0.7354	0.0266
	PPT2	palmitoyl-protein thioesterase 2	0.6426	0.0089	-0.0891	0.68
	PDZD3	PDZ domain containing 3	-0.0115	0.9463	-0.5231	0.0076
	PPIA	peptidylprolyl isomerase A (cyclophilin A)	0.556	0.0409	0.2453	0.3374
	PET100	PET100 homolog	0.6028	0.0075	-0.441	0.0385
	PSPH	phosphoserine phosphatase	0.65	0.0017	0.1478	0.3951
	PIPOX	pipecolic acid oxidase	-0.1683	0.421	-0.5061	0.0258
	PLLP	plasmolipin	0.5191	0.0211	-0.1955	0.3447
	PLEK2	pleckstrin 2	0.549	0.0396	0.3677	0.1509
	PBX1	pre-B-cell leukemia homeobox 1	0.5591	0.0426	0.0008	0.9974
	PFDN5	prefoldin subunit 5	0.7108	0.0454	-0.056	0.8652
	PROK2	prokineticin 2	-0.419	0.2068	-0.732	0.0365
	DKFZP686D09174	Proteasome subunit alpha type-2	-0.0343	0.886	-0.5115	0.0473
	RP11-383H13.1	Protein LOC100132891; cDNA FLJ53548	0.6546	0.0338	-0.121	0.6705
	CTD-3088G3.8	Protein LOC388210	-0.1927	0.4125	-0.5328	0.0349
	RILP	Rab interacting lysosomal protein	0.555	0.0337	0.2515	0.3041
	RGS10	regulator of G-protein signaling 10	0.6723	0.0196	0.2683	0.311
	RFX1	regulatory factor X, 1 (influences HLA class II expression)	-0.6177	0.0086	0.2585	0.2225
	RENBP	renin binding protein	-0.2332	0.1492	-0.5086	0.005
	RFPL3S	RFPL3 antisense	-0.5814	0.0344	-0.291	0.2603
	ARHGEF18	Rho guanine nucleotide exchange factor 18	0.1393	0.5362	0.6104	0.0148
	RPL27	ribosomal protein L27	0.9898	0.0201	0.0121	0.9749
	RPL27A	ribosomal protein L27a	0.5086	0.0253	-0.0093	0.9643
	RPL30	ribosomal protein L30	0.9204	0.0147	0.2292	0.4998
	RPL32P3	ribosomal protein L32 pseudogene 3	-0.0666	0.7193	0.5916	0.0057
	RPL35	ribosomal protein L35	0.797	0.0433	0.2376	0.5185
	RPL35A	ribosomal protein L35a	1.0017	0.0222	0.2224	0.5771
	RPL39	ribosomal protein L39	1.2165	0.0359	0.796	0.1511
	RPL41	ribosomal protein L41	0.8795	0.0234	0.1481	0.6749
	RPL5	ribosomal protein L5	0.5755	0.0282	0.1049	0.6625
	RPS10	ribosomal protein S10	0.9827	0.0079	0.0555	0.8638
	RPS13	ribosomal protein S13	0.5825	0.0136	0.0516	0.8064
	RPS14	ribosomal protein S14	0.501	0.0325	-0.0416	0.8465
	RPS15A	ribosomal protein S15a	1.2017	0.0212	0.0399	0.9326
	RPS18	ribosomal protein S18	0.7464	0.0226	-0.0434	0.8836
	RPS21	ribosomal protein S21	0.8772	0.0448	0.0174	0.9657
	RPS27	ribosomal protein S27	1.097	0.039	-0.0706	0.8856
	RPS29	ribosomal protein S29	1.1685	0.0234	0.2844	0.5458
	RPS3A	ribosomal protein S3A	1.1809	0.0478	-0.0779	0.8882
	RPS4XP16	ribosomal protein S4X pseudogene 16	0.1373	0.5356	0.6191	0.0125
	RPS6	ribosomal protein S6	0.7843	0.028	0.0391	0.9046
	RPS8	ribosomal protein S8	0.525	0.0481	0.0619	0.802
	RBX1	ring-box 1, E3 ubiquitin protein ligase	0.6179	0.049	0.0837	0.7745
	RUFY4	RUN and FYVE domain containing 4	-0.5079	0.0465	-0.1216	0.6094
	SSPO	SCO-spondin homolog (Bos taurus)	-0.6736	0.0013	-0.2176	0.2179
	SELK	Selenoprotein K	0.5105	0.0265	0.0911	0.665
	SGKL	Serine/threonine-protein kinase Sgk3	0.8943	0.0456	-0.0209	0.9599
	SMKR1	small lysine-rich protein 1	0.9361	0.005	0.674	0.0314
	SLC35E2	solute carrier family 35, member E2	0.0396	0.8753	0.5997	0.0296
	SLC37A3	solute carrier family 37 (glycerol-3-phosphate transporter), member 3	-0.199	0.3156	-0.5261	0.0156
	SHD	Src homology 2 domain containing transforming protein D	-0.0091	0.9683	0.5649	0.0253
	ST3GAL3	ST3 beta-galactoside alpha-2,3-sialyltransferase 3	0.6494	0.0145	0.0265	0.911
	ST3GAL4	ST3 beta-galactoside alpha-2,3-sialyltransferase 4	-0.3277	0.1774	-0.6289	0.0164
	STRADB	STE20-related kinase adaptor beta	0.6695	0.0417	0.4355	0.1669
	STX16-NPEPL1	STX16-NPEPL1 readthrough (non-protein coding)	0.0624	0.7363	-0.5316	0.011
	SAPCD1	suppressor APC domain containing 1	-0.2815	0.2235	-0.6271	0.0132
	TRAV10	T cell receptor alpha variable 10	0.1247	0.5647	0.7163	0.0044
	TRAV23DV6	T cell receptor alpha variable 23/delta variable 6	-0.1524	0.6208	0.6742	0.042
	TRBV27	T cell receptor beta variable 27	-0.5464	0.0461	0.2603	0.3149
	TRDC	T cell receptor delta constant	0.5832	0.0077	0.122	0.5261
	TRDV2	T cell receptor delta variable 2	0.7299	0.0367	0.4665	0.162
	TRGV11	T cell receptor gamma variable 11 (non-functional)	0.64	0.0018	-0.2387	0.1753
	TRGV9	T cell receptor gamma variable 9	0.7256	0.0039	0.3308	0.1383
	TESC	tescalcin	0.5422	0.0568	0.6447	0.0271
	TXNDC17	thioredoxin domain containing 17	0.719	0.0262	0.1205	0.6834
	TLR5	toll-like receptor 5	-0.2436	0.2338	-0.5974	0.0086
	TRIAP1	TP53 regulated inhibitor of apoptosis 1	0.5302	0.0406	-0.2475	0.3101
	TRPA1	transient receptor potential cation channel, subfamily A, member 1	-0.309	0.1826	0.5707	0.0214
	TOMM5	translocase of outer mitochondrial membrane 5 homolog	0.7122	0.0437	0.3072	0.3551
	TOMM6	translocase of outer mitochondrial membrane 6 homolog	0.5858	0.0183	0.2991	0.1942
	TMEM191A	transmembrane protein 191A (pseudogene)	0.5164	0.0051	0.1321	0.41
	TMEM256	transmembrane protein 256	0.5762	0.046	-0.0794	0.7674
	TMLHE	trimethyllysine hydroxylase, epsilon	-0.8498	0	0.1293	0.3923
	TMOD1	tropomodulin 1	0.5796	0.0181	0.4261	0.0693
	TPGS2	tubulin polyglutamylase complex subunit 2	0.4145	0.0956	0.6084	0.0201
	TTLL10	tubulin tyrosine ligase-like family, member 10	0.5611	0.0248	-0.0448	0.8436
	TUBB2A	tubulin, beta 2A class IIa	1.0225	0.0241	0.3694	0.3766
	TPT1	tumor protein, translationally-controlled 1	1.1304	0.0316	0.1906	0.6932
	UBL5	ubiquitin-like 5	0.6075	0.032	0.0528	0.8391
	UFSP2	UFM1-specific peptidase 2	-0.0136	0.9453	0.5721	0.0106
	CTD-2054N24.2	Uncharacterized protein	0.7462	0.0422	0.2985	0.3864
	AC037459.4	Uncharacterized protein	0.4285	0.1549	-0.8588	0.0093
	RP5-1021I20.4	Uncharacterized protein	-0.0565	0.7075	-0.565	0.0018
	AC019206.1	Uncharacterized protein	0.3742	0.4975	-1.4097	0.02
	AC007382.1	Uncharacterized protein	-1.802	0.0568	2.7246	0.0073
	VPS9D1	VPS9 domain containing 1	-0.381	0.1538	-0.6385	0.0242
	VSIG10	V-set and immunoglobulin domain containing 10	0.526	0.037	0.1848	0.4317
	WDYHV1	WDYHV motif containing 1	-0.6445	0.0136	-0.298	0.2131
	YEATS4	YEATS domain containing 4	0.5501	0.0236	0.1738	0.436
	ZBTB1	zinc finger and BTB domain containing 1	-0.0634	0.7009	0.5016	0.0078
	ZBTB16	zinc finger and BTB domain containing 16	0.1303	0.6697	0.8053	0.0175
	ZBTB8OS	zinc finger and BTB domain containing 8 opposite strand	0.0846	0.6514	-0.503	0.0158
	ZNF22	zinc finger protein 22	0.5952	0.0326	0.0463	0.8564
	ZNF519	zinc finger protein 519	0.1662	0.4955	0.576	0.0294
	ZNF525	zinc finger protein 525	0.5929	0.012	-0.2177	0.3074
	ZNF578	zinc finger protein 578	0.6884	0.039	0.149	0.6297
	ZNF585A	zinc finger protein 585A	0.6228	0.0054	-0.0701	0.717
	ZNF790	zinc finger protein 790	0.5458	0.0096	0.1362	0.4665
	ZDHHC19	zinc finger, DHHC-type containing 19	-0.2404	0.3448	-0.5919	0.0304
	ZWILCH	zwilch kinetochore protein	0.9075	0.0025	0.1403	0.5797
1 Estimates (β; estimated slope) and P-values were determined for each variable using a linear mixed-effects modeling (n=8 per group; data points p=32).

## Sheet: TableS4
Supplementary Table S4. Correlations (≥0.7 or ≤-0.7) among differential markers after KBR intervention under no and AAE load
Condition	Marker	Marker	Pearson's r	P-value
No load	IL-6	IL4	1	0
		TTLL10	1	0
		ZNF790	0.891247	0.0170977
		KLRF1	-0.720144	0.043938
		HIST1H4H	-0.732762	0.038661
		TMOD1	-0.737746	0.0366884
		HECW2	-0.765999	0.0266739
		KLRC1	-0.776189	0.0235334
AAE load	GSSG	MFSD4	0.875531	0.00438202
		CACNA2D4	0.844584	0.00832486
		TRAV10	0.835943	0.00972516
		CFB	0.813156	0.0141074
		IL4	0.709495	0.0487132
		NT5M	-0.727313	0.0408895
		ZBTB8OS	-0.741955	0.035072
		DNAJC25-GNG10	-0.871824	0.00477144
	GSH:GSSG	GSSG	-0.849528	0.00758515
		AC007382.1	0.997976	0.0405074
		DNAJC25-GNG10	0.92851	0.000865172
		TRAV23DV6	0.921038	0.00115908
		TRPA1	0.902039	0.0139244
		EFTUD1	0.895233	0.00265369
		NT5M	0.815737	0.0135587
		RPS4XP16	0.770421	0.0252811
		ZBTB8OS	0.745446	0.0337645
		ESPN	-0.72779	0.0406912
		MFSD4	-0.758891	0.0290104
		LPAR1	-0.848805	0.00769057
		TRAV10	-0.850318	0.0074709
		CACNA2D4	-0.870369	0.0049301
		CFB	-0.948747	0.00032378
	GPX	AK2	0.791558	0.0192491
		UFSP2	0.764674	0.0271004
		TLR5	-0.707344	0.0497143
		Alanine	-0.750143	0.0320531
		Glutamine	-0.713305	0.0469706
		Glycine	-0.89416	0.00273374
	IL-6	IGHG4	0.836612	0.00961188
		C7orf55	-0.798897	0.0173893

## Sheet: TableS5
Supplementary Table S5. KEGG pathways related to oxidative stress after KBR intervention with and without AAE load
Condition	Category	Markers	Pathway	Function
No load	Clinical chemistry	IL-6	African trypanosomiasis	Infection
			AGE-RAGE signaling pathway in diabetic complications	Diabetes
			Amoebiasis	Infection
			Cellular senescence	Oxidative stress; Inflammation
			Chagas disease (American trypanosomiasis)	Disease
			Cytokine-cytokine receptor interaction	Inflammation
			Cytosolic DNA-sensing pathway	Immunity
			FoxO signaling pathway	Oxidative stress
			Graft-versus-host disease	Disease
			Hematopoietic cell lineage	Blood cell development
			Hepatitis B	Infection
			Herpes simplex infection	Infection
			HIF-1 signaling pathway	Oxidative stress; Inflammation
			HTLV-I infection	Infection
			Hypertrophic cardiomyopathy (HCM)	Disease
			IL-17 signaling pathway	Inflammation
			Inflammatory bowel disease (IBD)	Disease
			Influenza A	Infection
			Insulin resistance	Inflammation
			Intestinal immune network for IgA production	Immunity
			Jak-STAT signaling pathway	Oxidative stress; Inflammation
			Kaposi's sarcoma-associated herpesvirus infection	Infection
			Legionellosis	Infection
			Malaria	Infection
			Measles	Infection
			NOD-like receptor signaling pathway	Inflammation
			Non-alcoholic fatty liver disease (NAFLD)	Disease
			Pathways in cancer	Cancer
			Pertussis	Infection
			PI3K-Akt signaling pathway	Oxidative stress
			Prion diseases	Disease
			Rheumatoid arthritis	Disease
			Salmonella infection	Infection
			Th17 cell differentiation	Inflammation
			TNF signaling pathway	Inflammation
			Toll-like receptor signaling pathway	Inflammation
			Transcriptional misregulation in cancer	Cancer
			Tuberculosis	Infection
	Transcript	HIST1H4H	Alcoholism	Alcoholism
			Systemic lupus erythematosus	Immunity
			Viral carcinogenesis	Cancer
	Transcript	IL4	Allograft rejection	Immunity
			Asthma	Disease
			Autoimmune thyroid disease	Disease
			Cytokine-cytokine receptor interaction	Inflammation
			Fc epsilon RI signaling pathway	Immunity
			Hematopoietic cell lineage	Blood cell development
			IL-17 signaling pathway	Inflammation
			Inflammatory bowel disease (IBD)	Disease
			Intestinal immune network for IgA production	Immunity
			Jak-STAT signaling pathway	Oxidative stress; Inflammation
			Leishmaniasis	Infection
			Measles	Infection
			PI3K-Akt signaling pathway	Oxidative stress
			T cell receptor signaling pathway	Immunity
			Th1 and Th2 cell differentiation	Immunity
			Th17 cell differentiation	Inflammation
	Transcript	KLRC1	Antigen processing and presentation	Immunity
			Graft-versus-host disease	Disease
			Natural killer cell mediated cytotoxicity	Immunity
AAE load	Clinical chemistry	GSSG /GSH:GSSG	ABC transporters	Oxidative stress; Inflammation
			Bile secretion	Oxidative stress; Inflammation
			Cysteine and methionine metabolism	Oxidative stress
			Ferroptosis	Oxidative stress
			Glutathione metabolism	Oxidative stress; Inflammation
			Thyroid hormone synthesis	Metabolism
	Clinical chemistry	GPX	Amyotrophic lateral sclerosis (ALS)	Oxidative stress
			Arachidonic acid metabolism	Inflammation
			Glutathione metabolism	Oxidative stress; Inflammation
			Huntington's disease	Disease
			Thyroid hormone synthesis	Metabolism
	Clinical chemistry	IL-6	African trypanosomiasis	Infection
			AGE-RAGE signaling pathway in diabetic complications	Diabetes
			Amoebiasis	Infection
			Cellular senescence	Oxidative stress; Inflammation
			Chagas disease (American trypanosomiasis)	Disease
			Cytokine-cytokine receptor interaction	Inflammation
			Cytosolic DNA-sensing pathway	Infection
			FoxO signaling pathway	Oxidative stress
			Graft-versus-host disease	Disease
			Hematopoietic cell lineage	Blood cell development
			Hepatitis B	Infection
			Herpes simplex infection	Infection
			HIF-1 signaling pathway	Oxidative stress; Inflammation
			HTLV-I infection	Infection
			Hypertrophic cardiomyopathy (HCM)	Disease
			IL-17 signaling pathway	Inflammation
			Inflammatory bowel disease (IBD)	Disease
			Influenza A	Infection
			Insulin resistance	Inflammation
			Intestinal immune network for IgA production	Immunity
			Jak-STAT signaling pathway	Oxidative stress; Inflammation
			Kaposi's sarcoma-associated herpesvirus infection	Infection
			Legionellosis	Infection
			Malaria	Infection
			Measles	Infection
			NOD-like receptor signaling pathway	Inflammation
			Non-alcoholic fatty liver disease (NAFLD)	Disease
			Pathways in cancer	Cancer
			Pertussis	Infection
			PI3K-Akt signaling pathway	Oxidative stress
			Prion diseases	Disease
			Rheumatoid arthritis	Inflammation
			Salmonella infection	Infection
			Th17 cell differentiation	Inflammation
			TNF signaling pathway	Inflammation
			Toll-like receptor signaling pathway	Inflammation
			Transcriptional misregulation in cancer	Cancer
			Tuberculosis	Infection
	Metabolite	Glycine	ABC transporters	Oxidative stress; Inflammation
			Aminoacyl-tRNA biosynthesis	Oxidative stress
			Central carbon metabolism in cancer	Cancer
			Glutathione metabolism	Oxidative stress; Inflammation
			Glycine, serine and threonine metabolism	Oxidative stress
			Glyoxylate and dicarboxylate metabolism	Oxidative stress
			Lysine degradation	Oxidative stress
			Mineral absorption	Metabolism
			Neuroactive ligand-receptor interaction	Disease
			Phosphonate and phosphinate metabolism	Antibiotics
			Porphyrin and chlorophyll metabolism	Heme biosynthesis
			Primary bile acid biosynthesis	Metabolism
			Protein digestion and absorption	Metabolism
			Purine metabolism	Oxidative stress
			Synaptic vesicle cycle	Signal transduction
			Thiamine metabolism	Metabolism
	Transcript	AK2	Purine metabolism	Oxidative stress
			Thiamine metabolism	Metabolism
	Transcript	CACNA2D4	Adrenergic signaling in cardiomyocytes	Disease
			Arrhythmogenic right ventricular cardiomyopathy (ARVC)	Disease
			Cardiac muscle contraction	Disease
			Dilated cardiomyopathy (DCM)	Disease
			Hypertrophic cardiomyopathy (HCM)	Disease
			MAPK signaling pathway	Oxidative stress; Inflammation
			Oxytocin signaling pathway	Reproduction
	Transcript	CFB	Complement and coagulation cascades	Inflammation
			Staphylococcus aureus infection	Infection
	Transcript	LPAR1	Gap junction	Cell proliferation
			Neuroactive ligand-receptor interaction	Disease
			Pathways in cancer	Cancer
			Phospholipase D signaling pathway	Signal transduction
			PI3K-Akt signaling pathway	Oxidative stress
			Rap1 signaling pathway	Cancer
	Transcript	NT5M	Nicotinate and nicotinamide metabolism	Oxidative stress; Inflammation
			Purine metabolism	Oxidative stress
			Pyrimidine metabolism	Genetics
	Transcript	TLR5	Inflammatory bowel disease (IBD)	Disease
			Legionellosis	Infection
			Pathogenic Escherichia coli infection	Infection
			Salmonella infection	Infection
			Toll-like receptor signaling pathway	Inflammation
	Transcript	TRPA1	Inflammatory mediator regulation of TRP channels	Inflammation
